# Supplementary material
Source: publisher site journal article supplement (https://www.dovepress.com/get_supplementary_file.php?f=357099.docx)
Supplement: Supplementary file 1 [file get_supplementary_file.php]

**Appendix**

**Questionnaire for contact lens wearers**

**Section 1: Demographics data (5 items)**

1. Gender

🗌 Male 🗌 Female

1. Age……………………
2. Education level

🗌 High school 🗌 Vocational Certificate

🗌 Bachelor 🗌 Postgraduate

1. Why do you wear contact lenses?

🗌 Refractive

🌕 Myopia 🌕 Hyperopia 🌕 Astigmatism 🌕 Presbyopia

🗌 Cosmetic purposes only

🗌 Corneal disease

🗌 Other………….

1. How long do you wear contact lenses?

🗌 Less than 1 year 🗌 1-5 years

🗌 6-10 years 🗌 more than 10 years

**Section 2: Contact lens type and details (12 items)**

1. Type of contact lenses?

🗌 Soft lenses

Disposable

🌕 Daily 🌕 Weekly 🌕 Two-weekly

🌕 Monthly 🌕 Quarterly 🌕 Annual

🗌 Rigid gas permeable lenses

🗌 Cosmetic Plano contact lenses

🗌 Other………….

1. How many days a week you wear contact lenses (check)? 1 2 3 4 5 6 7
2. How many hours a day you wear contact lenses (1 to 24)? ……………..
3. Complete brand name of your contact lenses and cleaning solution?

Contact lenses ………………………….

Disinfecting solution…………………….

🗌 I don’t know

1. Where did you purchase your contact lenses?

🗌 Hospital 🗌 Eye clinic 🗌 Pharmacy 🗌 Optical shop

🗌 Internet 🗌 Grocery store 🗌 Flea market 🗌 Other....................

1. Where did you purchase your disinfecting solution?

🗌 Hospital 🗌 Eye clinic 🗌 Pharmacy 🗌 Optical shop

🗌 Internet 🗌 Grocery store 🗌 Flea market 🗌 Other....................

1. Who fitted your contact lenses?

🗌 Ophthalmologist 🗌 Optometrist 🗌 Optician

🗌 Pharmacist 🗌 Friends 🗌 None 🗌 Other....................

1. Who explained how to put on/remove lenses and lens care and hygiene?

🗌 Ophthalmologist 🗌 Optometrist 🗌 Optician

🗌 Pharmacist 🗌 Friends 🗌 None 🗌 Other....................

1. Did you receive any information about lens care and hygiene?

🗌 No 🗌 Yes

🌕 written 🌕 Oral

Was it sufficient?

🌕 No

🌕 Yes

1. Have you ever experienced any complications from wearing contact lens?

🗌 No 🗌 Yes

🌕 Tearing 🌕 Dry eye 🌕 Red eye

🌕 Eye itch 🌕 Eye Crust 🌕 Eye irritation

🌕 Blurred Vision 🌕 Other..............

What have you done to improve the situation?

🗌 Consultation 🗌 Removing lenses

🗌 Treatment with antibiotic eye drops……………….

🗌 No treatment

🗌 Other..............

1. Have you had an infection since you started wearing contact lenses?

🗌 No 🗌 Yes

🌕 Conjunctivitis 🌕 Abscesses Keratitis 🌕 Other...............

i. How many times?...................

ii. When was the last time?.................

iii. What have you done to improve the situation?

🗌 Consultation 🗌 Removing lenses

🗌 Treatment with antibiotic eye drops……………….

🗌 No treatment

🗌 Other..............

1. Have you ever undergone eye check-ups with ophthalmologists annually?

🗌 No 🗌 Yes

**Section 3: Contact lens wear behaviors (12 items)**

1. Have you ever worn contact lens during sleeping overnight?

🗌 No 🗌 Yes 🌕 Frequently 🌕 Rarely

1. Have you ever shared contact lens with friends?

🗌 No 🗌 Yes 🌕 Frequently 🌕 Rarely

1. Do you ever exceed the recommended period of renewal for your lenses?

🗌 No 🗌 Yes 🌕 Frequently 🌕 Rarely

1. Do you ever exceed the recommended period of renewal for your cleaning solution?

🗌 No 🗌 Yes 🌕 Frequently 🌕 Rarely

1. Have you worn your lenses in water?

Swimming pool? 🗌 No 🗌 Yes

Freshwater (i.e. river, lake…)? 🗌 No 🗌 Yes

Seawater? 🗌 No 🗌 Yes

Shower / Bath? 🗌 No 🗌 Yes

Face wash? 🗌 No 🗌 Yes

1. How often do you actually renew your contact lenses?

🗌 Daily 🗌 Weekly 🗌 Two-weekly 🗌 Monthly

🗌 Quarterly 🗌 Annual

1. Have you used eye drops with your lenses?

🗌 No 🗌 Yes

🌕 Artificial tears 🌕 Antibiotics 🌕 Other..............

1. Do you smoke?

🗌 No 🗌 Yes

1. Are you subjected to passive smoke?

🗌 No 🗌 Yes

1. Do you work on a computer screen?

🗌 No 🗌 Yes, how many hours/day? ……..

1. Are you in contact with air conditioning (office, car)?

🗌No 🗌 Yes, how many hours/day? ……..

1. Do you use eye makeup or spray?

🗌 No 🗌 Yes

**Section 4: Contact lens care (23 items)**

1. Do you always check contact lens expiration date and packaging before use?

🗌 No 🗌 Yes

1. Do you always check contact lenses correct side before wearing?

🗌 No 🗌 Yes

1. Do you always wash your hands before putting on your lenses?

🗌 No 🗌 Yes

Do you use soap? 🌕 No 🌕 Yes

Do you dry your hands? 🌕 No 🌕 Yes

1. What do you do before putting on your lenses?

🗌 Rub your lenses 🗌 Rinse your lenses 🗌 Rub and rinse 🗌 None

1. Do you always wash your hands before taking out your lenses?

🗌 No 🗌 Yes

Do you use soap? 🌕 No 🌕 Yes

Do you dry your hands? 🌕 No 🌕 Yes

1. What do you do after removing your lenses?

🗌 Rub your lenses 🗌 Rinse your lenses 🗌 Rub and rinse 🗌 None

1. Have you ever used tap water to clean your lenses or case?

🗌 No 🗌 Yes 🌕 Frequently 🌕 Rarely

1. Have you ever used saliva to clean your lenses or case?

🗌 No 🗌 Yes 🌕 Frequently 🌕 Rarely

1. Have you ever used normal saline to clean your lenses or case?

🗌 No 🗌 Yes 🌕 Frequently 🌕 Rarely

1. Have you ever used saliva to clean your lenses or case?

🗌 No 🗌 Yes 🌕 Frequently 🌕 Rarely

1. Have you ever used lenses been in contact with a sink?

🗌 No 🗌 Yes 🌕 Frequently 🌕 Rarely

1. Do you always insert and remove the contact lens, starting with the same eye?

🗌 No 🗌 Yes 🌕 Frequently 🌕 Rarely

1. Do you soak your lens with cleaning solutions for at least 6 hours?

🗌 No 🗌 Yes 🌕 Frequently 🌕 Rarely

1. Do you use fresh contact lens solution every day?

🗌 No 🗌 Yes 🌕 Frequently 🌕 Rarely

1. Have you ever used topping off your old cleaning solution for soak your lens?

🗌 No 🗌 Yes 🌕 Frequently 🌕 Rarely

1. Do you always close the cap of your cleaning solution bottle tightly after opening it?

🗌 No 🗌 Yes 🌕 Frequently 🌕 Rarely

1. Once opened, how long do you keep the bottle of cleaning solution?

….... months ….... years

1. Do you use a contact lens case?

🗌 No 🗌 Yes

1. Do you always close the cap of your case tightly after opening it?

🗌 No 🗌 Yes

1. How often do you throw the case away?

….... months ….... years

1. How do you clean the case?

🗌 Water 🗌 Soap 🗌 Contact lens solution 🗌 None 🗌 Other........

1. Do you dry your case?

🗌 No 🗌 Yes

1. How often do you clean your lenses?

🗌 Daily 🗌 Weekly 🗌 Two-weekly 🗌 Monthly

🗌 Quarterly 🗌 Annual 🗌 Never
